# Supplementary material
Source: Springer Nature journal article supplement (https://www.springermedizin.de/resource/supplementary/12950_2013_296_MOESM3_ESM.pdf/9557496)

## A Neutrophil recruitment

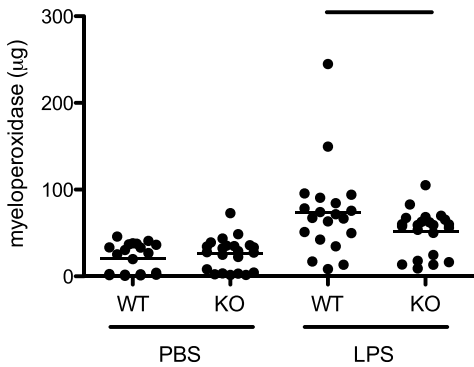

## B Skin histology

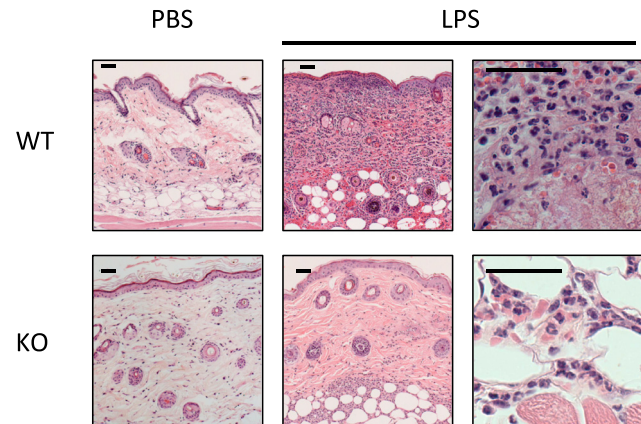

## C Cytokine production

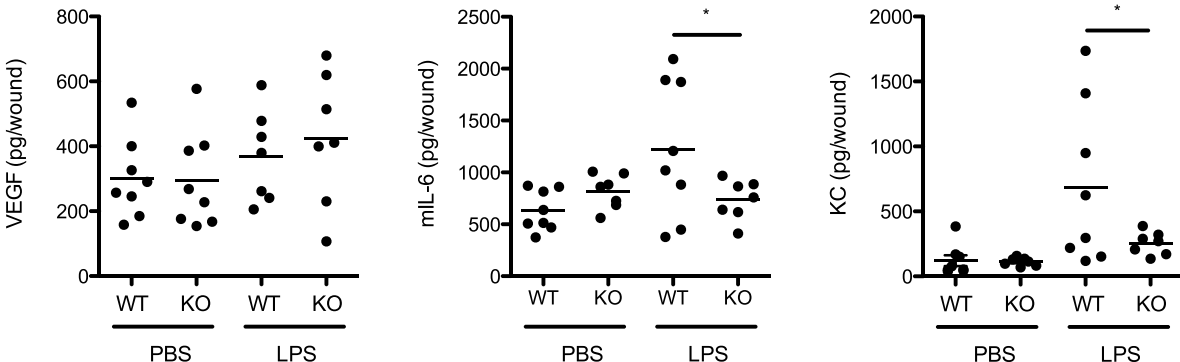

Supplement: MOESM3 [file 9557496]
